# Supplementary material
Source: PubMed Central journal article supplement (PMC4512545)
Supplement: 10.1534_115.178103_genetics.115.178103-1.pdf [file 10.1534_115.178103_genetics.115.178103-1.pdf]

Virulence gene regulation by L-arabinose  
in *Salmonella enterica*

Javier López-Garrido, Elena Puerta-Fernández, Ignacio Cota,  
and Josep Casadesús

**SUPPORTING INFORMATION**

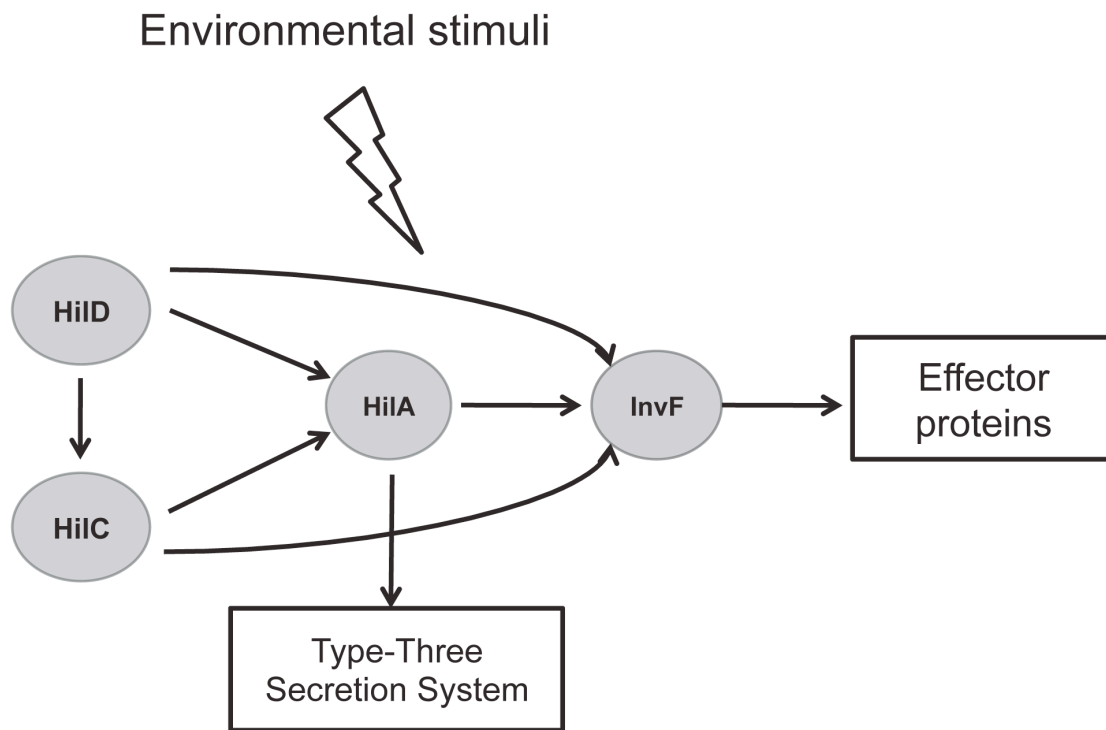

**Figure S1** Diagram representing the regulatory network of SPI-1-encoded transcriptional activators.

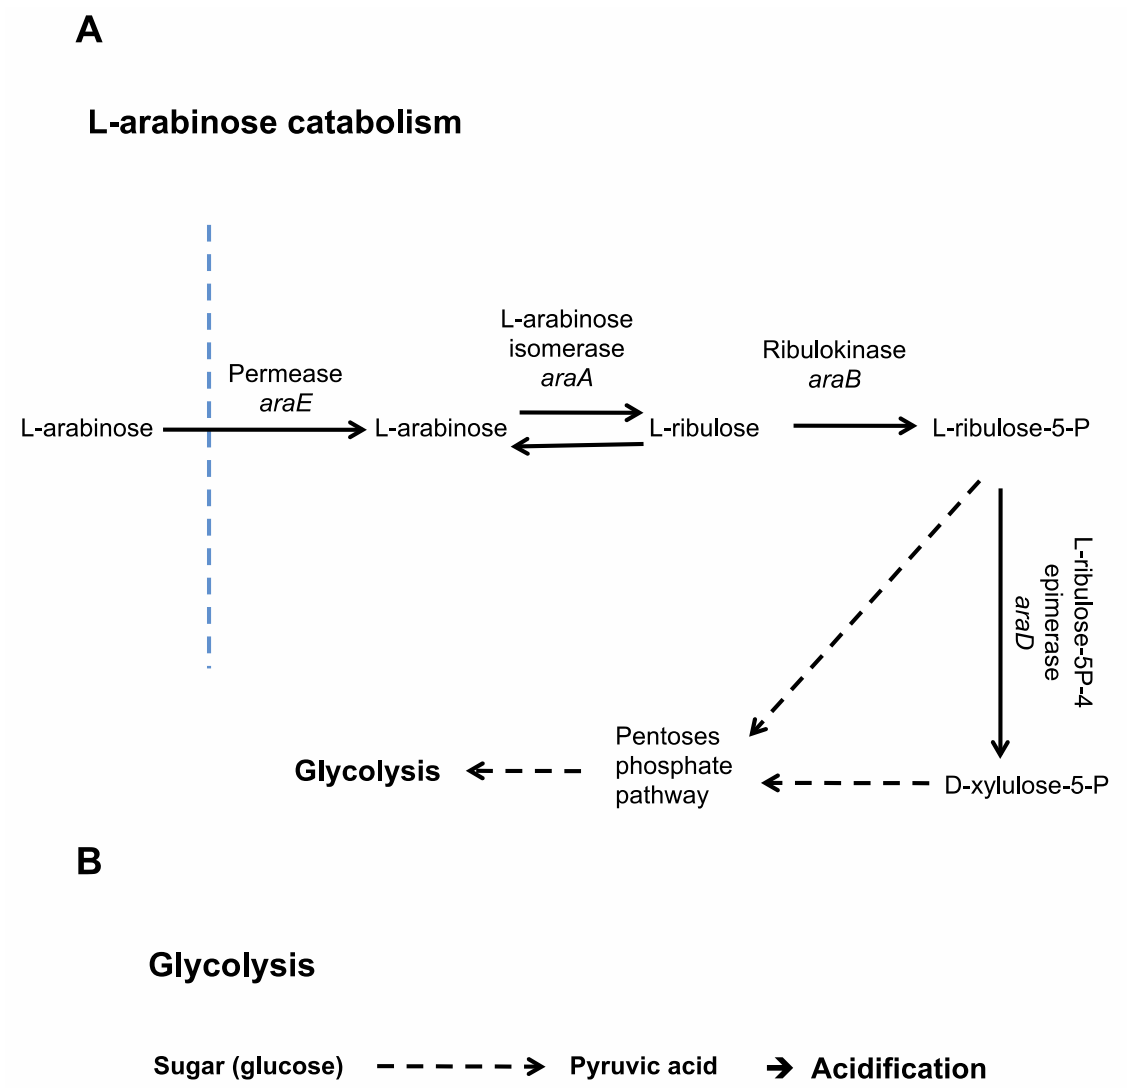

**Figure S2** **A.** L-arabinose catabolism in *Salmonella*. Main steps in L-arabinose catabolism, enzymes involved and genes encoding the enzymes (in italics). **B.** Cause of culture medium acidification upon addition of a metabolizable sugar to LB.

**A**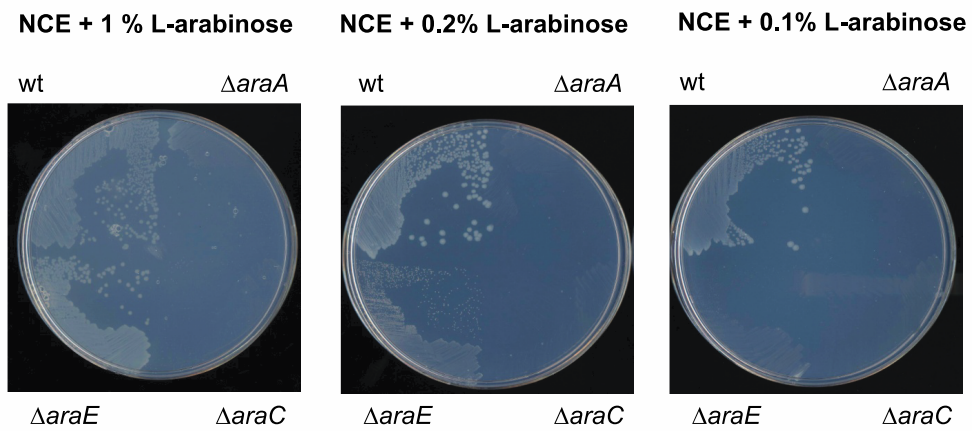**B**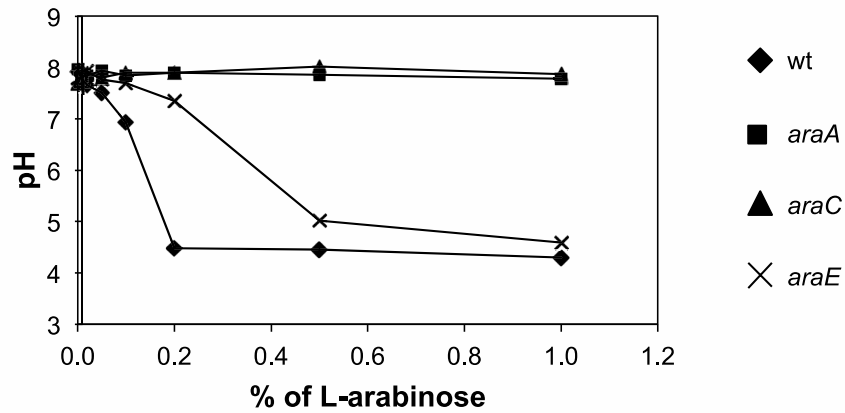

**Figure S3** Phenotypes associated with *araA*, *araC*, and *araE* mutations. **A.** Growth of the wild type,  $AraA^-$ ,  $AraC^-$ , and  $AraE^-$  strains on minimal agar with 1%, 0.2% or 0.1% L-arabinose as sole carbon source. **B.** pH curves of the wild type,  $AraA^-$ ,  $AraC^-$  and  $AraE^-$  strains.

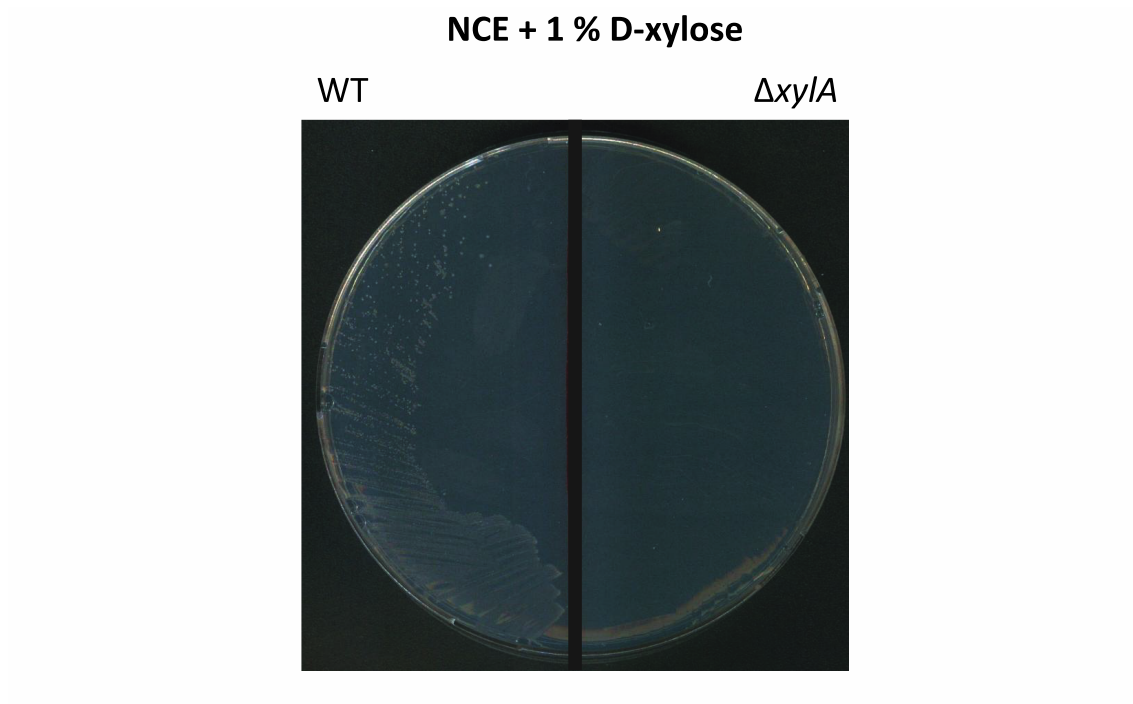

**Figure S4** Growth of the wild type and an isogenic  $XylA^-$  strain on minimal agar with 1% D-xylose as sole carbon source.

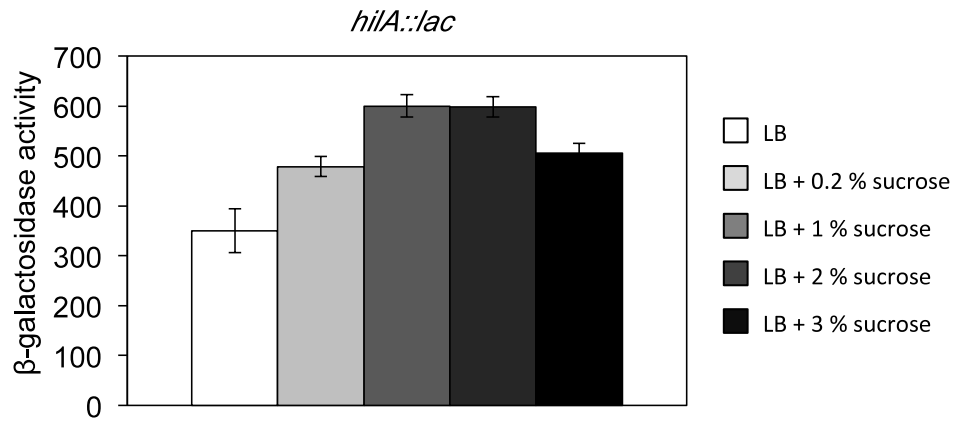

**Figure S5**  $\beta$ -galactosidase activity of a *hilA::lac* fusion in LB and LB + 0.2%, 1%, 2%, and 3% sucrose.

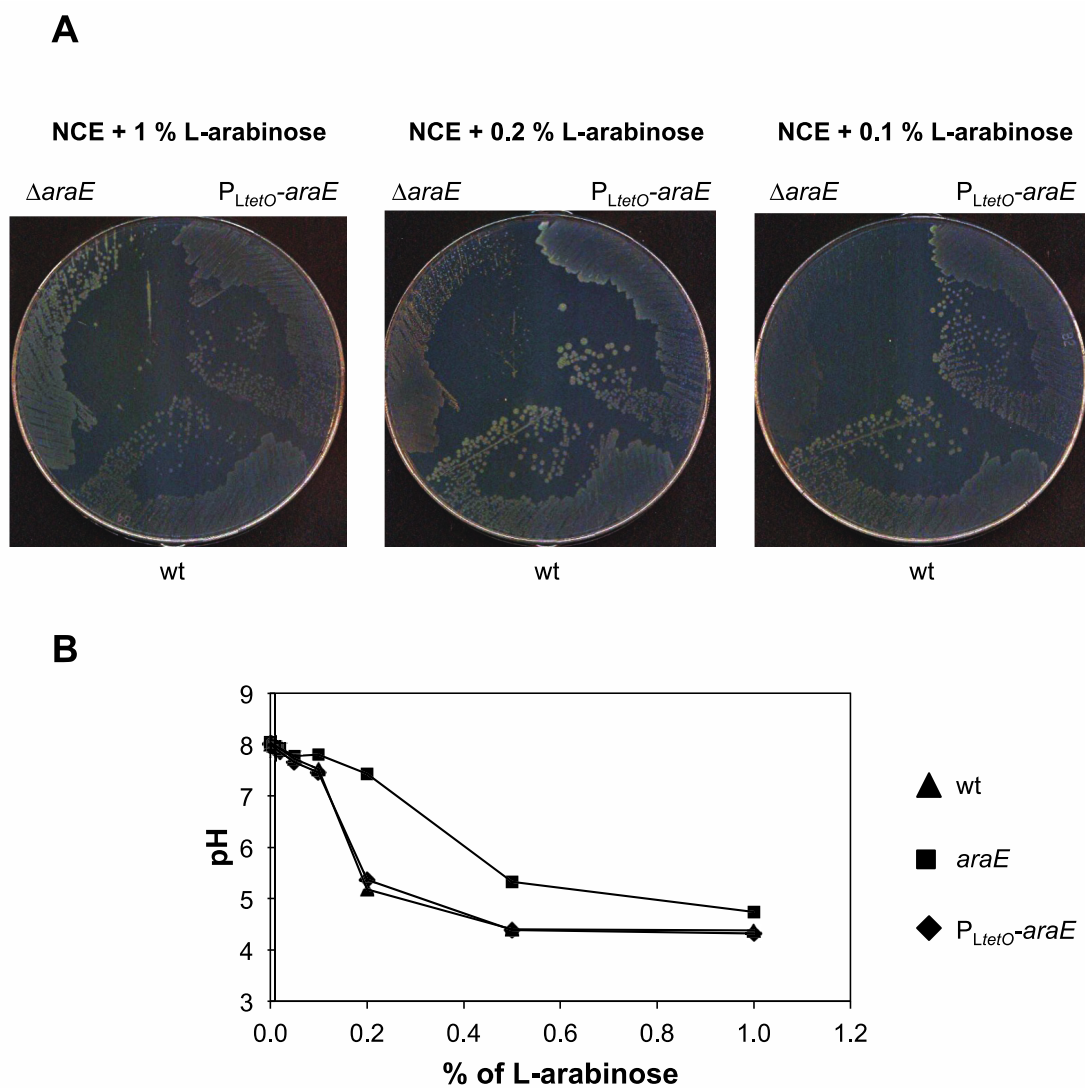

**Figure S6** Phenotypes associated with *araE*. **A.** Growth of the wild type,  $AraE^-$ , and  $P_{LtetO-araE}$  strains in minimal medium with 1%, 0.2% or 0.1% L-arabinose as sole carbon source. **B.** pH curves of wt,  $AraE^-$ , and  $P_{LtetO-araE}$  strains.

**Table S1** Oligonucleotides used in this study (5'→3')

| Oligonucleotide | Sequence                                                         |
|-----------------|------------------------------------------------------------------|
| araAUP          | ctgactcattaaggacacgacaatgacgattttgataatattccggggatccgctgacc      |
| araADO          | gcaatccgttcaccaattaacgtttgaacccgtaatacagtgtaggctggagctgcttc      |
| araA-E1         | tgcgacgtactgaatcgctc                                             |
| araA-E2         | accaccacatatacgctcagc                                            |
| xylAUP          | cgtttacttgccgtcttatctgattatggagctcactatgattccggggatccgctgacc     |
| xylADO          | ggccgggctaacgcggagtcgcccggtagatagggtattgtgtaggctggagctgcttc      |
| xylA-E1         | aattcatcacagcaaacgg                                              |
| xylA-E2         | caggatagctttacacccg                                              |
| PLtetO-araE-UP  | tgggttaacttaatccatatattgttaaataatagctataggcttaccgcttactgtc       |
| PLtetO-araE-DO  | ttaatagagaccatatttctgccacaacagagtaagacgtgctcagtatctctatcactgatag |
| araEUP          | ttcaggctatgtcttactctgttggcaggaaaatagattccggggatccgctgacc         |
| araEDO          | cggataacaggcgtcatccggcatgggaggggggattacagtgtaggctggagctgcttc     |
| araE-E1         | tataccatagcggtagatggc                                            |
| araE-E2         | agtcgattcccagctcatc                                              |
| araCUP          | tttgtttctctctgaacatcgggggtagagaaatcatgattccggggatccgctgacc       |
| araCDO          | gcttatgacatcttggacacatcattcactttttattgtgtaggctggagctgcttc        |
| araC-E1         | tcaatgtggacattccagc                                              |
| araC-E2         | gataaagtgtccagcagtg                                              |
| hilDUP1         | agagcattacaactcagatttttcagtaggataaccagtcatatgaatatcctccttag      |
| hilDUP930       | aactacgcatcgacattcataaaaatggcgaaccattaacatatgaatatcctccttag      |
| hilD-lacZUP     | tgaacatctgaaaacggcgttctcctgtacgaaggatacaccgctgtttacaacgctg       |
| hilD-lacZDO     | gcaaatagttctcagagggaaacggatgatgtataaataatgcgtgtaggctggagctgcttc  |
| hilDDO2         | gcaaatagttctcagagggaaacggatgatgtataaataatggtgtaggctggagctgcttc   |
| hilD-E1         | agaccattgccaacacacgc                                             |



|                 |                                                   |
|-----------------|---------------------------------------------------|
| hilD-E2'        | atcatcctcaggctggctcc                              |
| pXG10-hilD-UP   | gtttttatgcataaggaacattaaaataacatcaac              |
| pXG10-hilD-DO   | gtttttgctagcggcaaatagttctcagaggg                  |
| pXG10-FOR       | ttggaacctcttacgtgcc                               |
| pXG10-REV       | gcatcaccttcaccctctc                               |
| hilDriboprobeUP | atggaaaatgtaacctttgtaag                           |
| hilDriboprobeDO | gttttttaatacgactcactatagggaggatatacgaaatccatgtggc |
| rnpBriboprobeUP | gaagaagtgaaactgaccgataagc                         |
| rnpBriboprobeDO | taatacgactcactataggccgaagctgaccagacagtcg          |
