# Supplementary material
Source: PubMed Central journal article supplement (PMC4512545)
Supplement: 10.1534_115.178103_genetics.115.178103-2.pdf [file 10.1534_115.178103_genetics.115.178103-2.pdf]

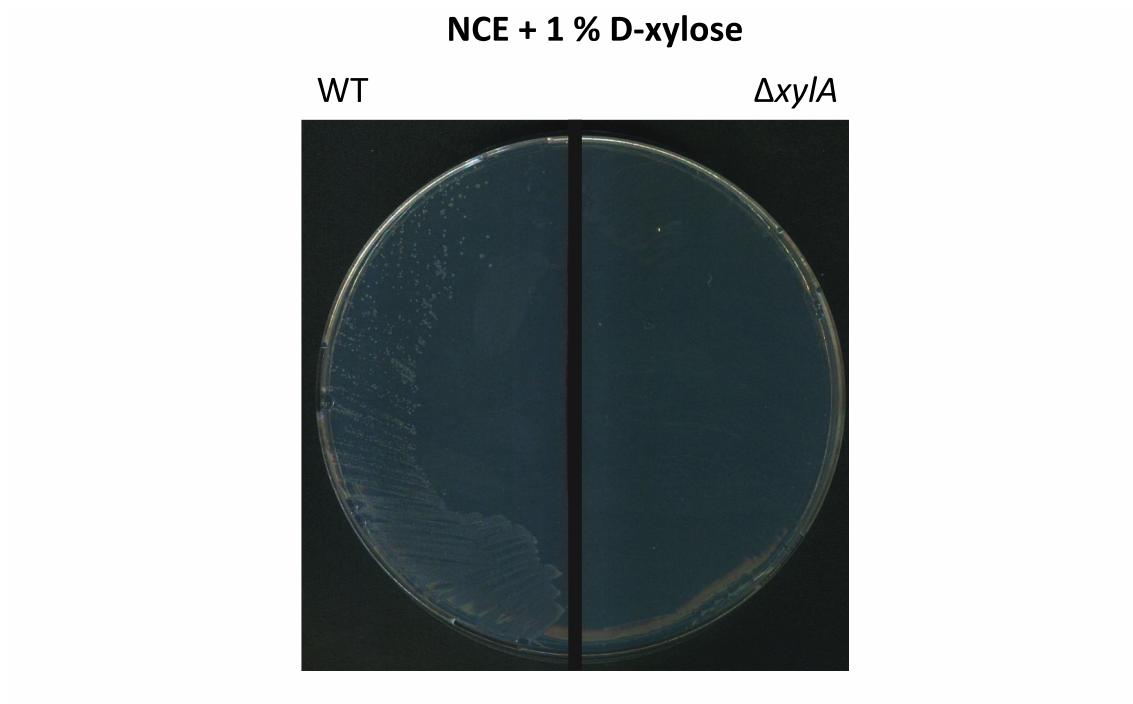

**Figure S4** Growth of the wild type and an isogenic  $XylA^-$  strain on minimal agar with 1% D-xylose as sole carbon source.
