# Supplementary material
Source: PubMed Central journal article supplement (PMC4512545)
Supplement: 10.1534_115.178103_genetics.115.178103-3.pdf [file 10.1534_115.178103_genetics.115.178103-3.pdf]

**Table S1** Oligonucleotides used in this study (5'→3')

| Oligonucleotide | Sequence                                                         |
|-----------------|------------------------------------------------------------------|
| araAUP          | ctgactcattaaggacacgacaatgacgattttgataatattccggggatccgctgacc      |
| araADO          | gcaatccgttcaccaattaacgtttgaaccgtaatacagtgtaggctggagctgcttc       |
| araA-E1         | tgcgacgtactgaatcgtcc                                             |
| araA-E2         | accaccacatcctcgtcagc                                             |
| xylAUP          | cgtttacttgccgtcttatctgattatggagctcactatgattccggggatccgctgacc     |
| xylADO          | ggccgggctaacgcggagtcgcccggtagatagggtattgtgtaggctggagctgcttc      |
| xylA-E1         | aattcatcacagcaaacgg                                              |
| xylA-E2         | caggatagctttacacccg                                              |
| PLtetO-araE-UP  | tgggttaacttaatccatatattgttaaataatagctataggcttaccgcttactgtc       |
| PLtetO-araE-DO  | ttaatagagaccatatttctgccacaacagagtaagacgtgctcagtatctctatcactgatag |
| araEUP          | ttcaggctatgtcttactctgttggcaggaaaatgattccggggatccgctgacc          |
| araEDO          | cggataacaggcgtcatccggcatgggaggggggattacagtgtaggctggagctgcttc     |
| araE-E1         | tataccatagcggtagatggc                                            |
| araE-E2         | agtcgattcccagctcatc                                              |
| araCUP          | tttgtttctctctgaacatcgggggtagagaaatcatgattccggggatccgctgacc       |
| araCDO          | gcttatgacatcttggacacatcattcactttttattgtgtaggctggagctgcttc        |
| araC-E1         | tcaatgtggacattccagc                                              |
| araC-E2         | gataaagtgtccagcagtg                                              |
| hilDUP1         | agagcattacaactcagatttttcagtaggataaccagtcatatgaatatcctccttag      |
| hilDUP930       | aactacgcatcgacattcataaaaatggcgaaccattaacatatgaatatcctccttag      |
| hilD-lacZUP     | tgaacatctgaaaacggcgttctcctgtacgaaggatacaccgctgtttacaacgctg       |
| hilD-lacZDO     | gcaaatagttctcagaggaacggatgatgtataaatatgcgtgtaggctggagctgcttc     |
| hilDDO2         | gcaaatagttctcagaggaacggatgatgtataaatatggtgtaggctggagctgcttc      |
| hilD-E1         | agaccattgccaacacacgc                                             |

|                 |                                                   |
|-----------------|---------------------------------------------------|
| hilD-E2'        | atcatcctcaggctggctcc                              |
| pXG10-hilD-UP   | gtttttatgcataaggaacattaaaataacatcaac              |
| pXG10-hilD-DO   | gtttttgctagcggcaaatagttctcagaggg                  |
| pXG10-FOR       | ttggaacctcttacgtgcc                               |
| pXG10-REV       | gcatcaccttcaccctctc                               |
| hilDriboprobeUP | atggaaaatgtaacctttgtaag                           |
| hilDriboprobeDO | gttttttaatacgactcactatagggaggatatacgaaatccatgtggc |
| rnpBriboprobeUP | gaagaagtgaaactgaccgataagc                         |
| rnpBriboprobeDO | taatacgactcactataggccgaagctgaccagacagtcg          |
