# Supplementary material
Source: PubMed Central journal article supplement (PMC4512545)
Supplement: 10.1534_115.178103_genetics.115.178103-4.pdf [file 10.1534_115.178103_genetics.115.178103-4.pdf]

**A**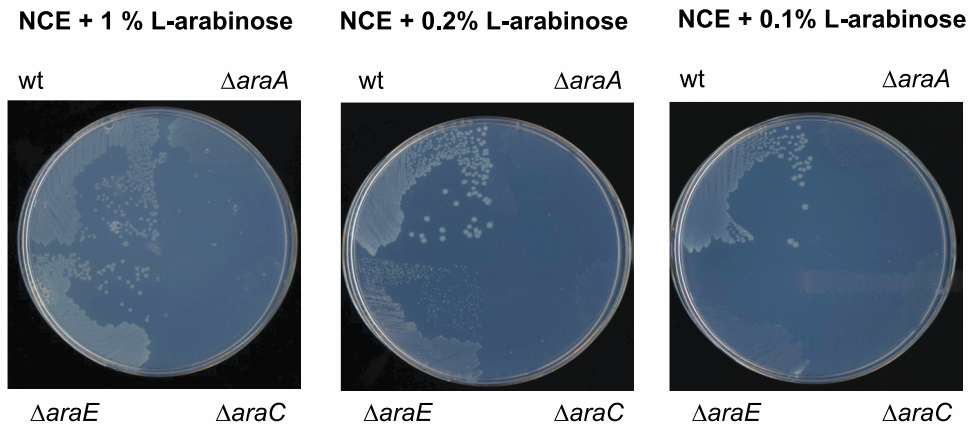**B**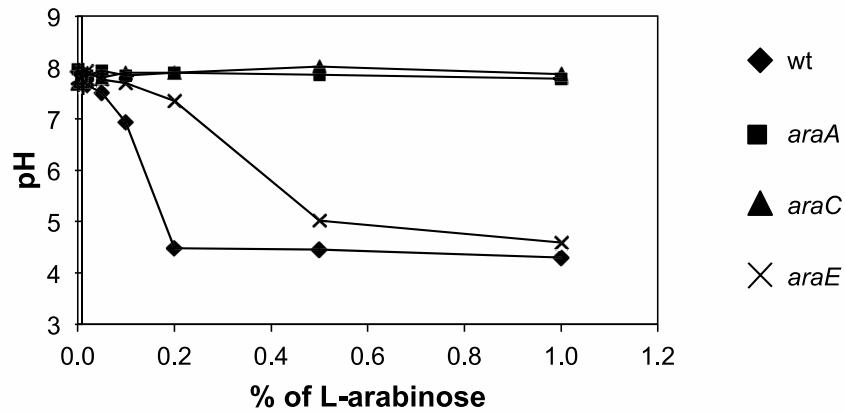

**Figure S3** Phenotypes associated with *araA*, *araC*, and *araE* mutations. **A.** Growth of the wild type,  $AraA^-$ ,  $AraC^-$ , and  $AraE^-$  strains on minimal agar with 1%, 0.2% or 0.1% L-arabinose as sole carbon source. **B.** pH curves of the wild type,  $AraA^-$ ,  $AraC^-$  and  $AraE^-$  strains.
