# Supplementary material
Source: PubMed Central journal article supplement (PMC4512545)
Supplement: 10.1534_115.178103_genetics.115.178103-5.pdf [file 10.1534_115.178103_genetics.115.178103-5.pdf]

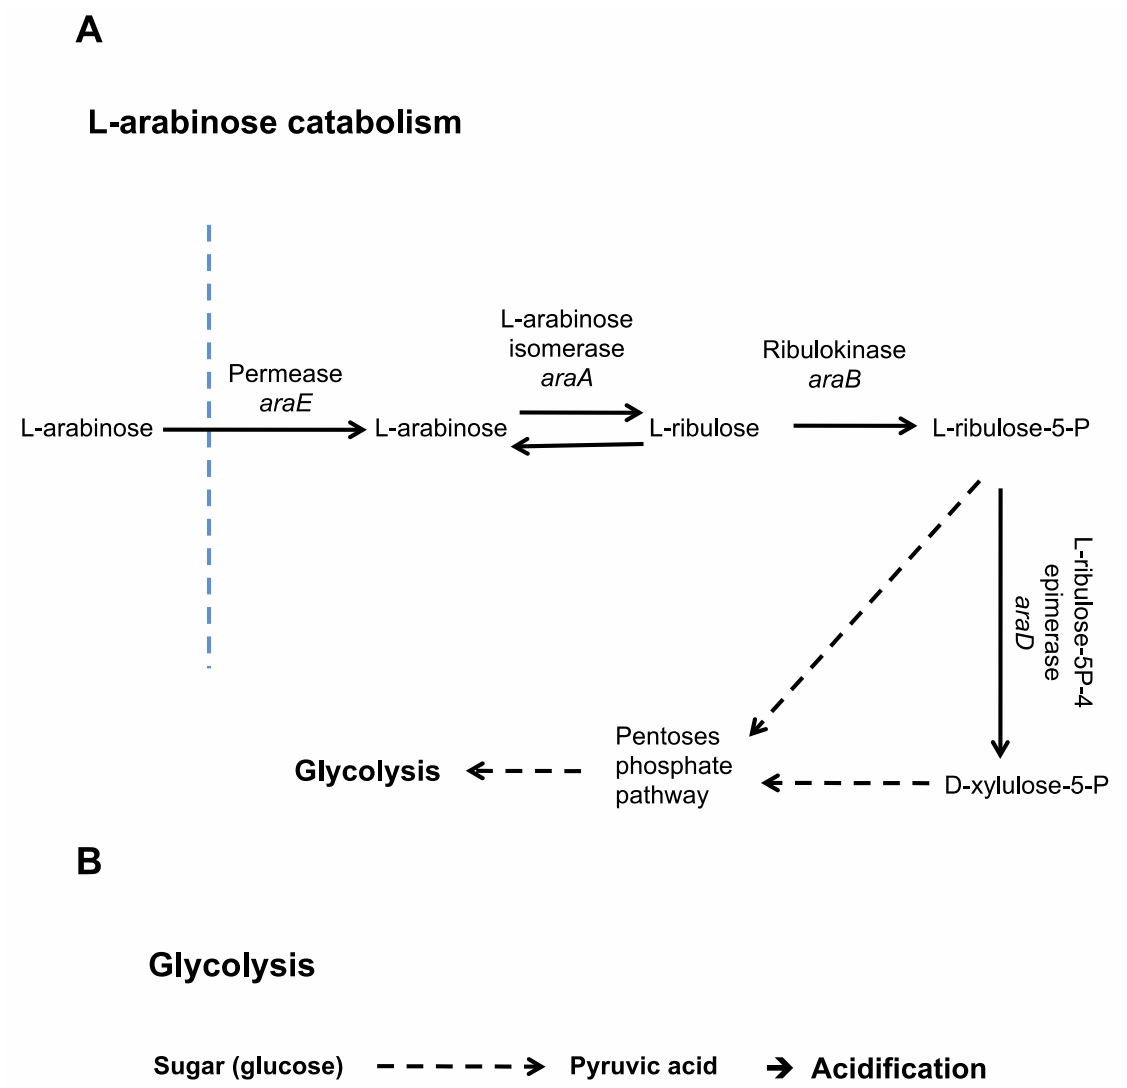

**Figure S2** **A.** L-arabinose catabolism in *Salmonella*. Main steps in L-arabinose catabolism, enzymes involved and genes encoding the enzymes (in italics). **B.** Cause of culture medium acidification upon addition of a metabolizable sugar to LB.
