# Supplementary material
Source: PubMed Central journal article supplement (PMC4512545)
Supplement: 10.1534_115.178103_genetics.115.178103-6.pdf [file 10.1534_115.178103_genetics.115.178103-6.pdf]

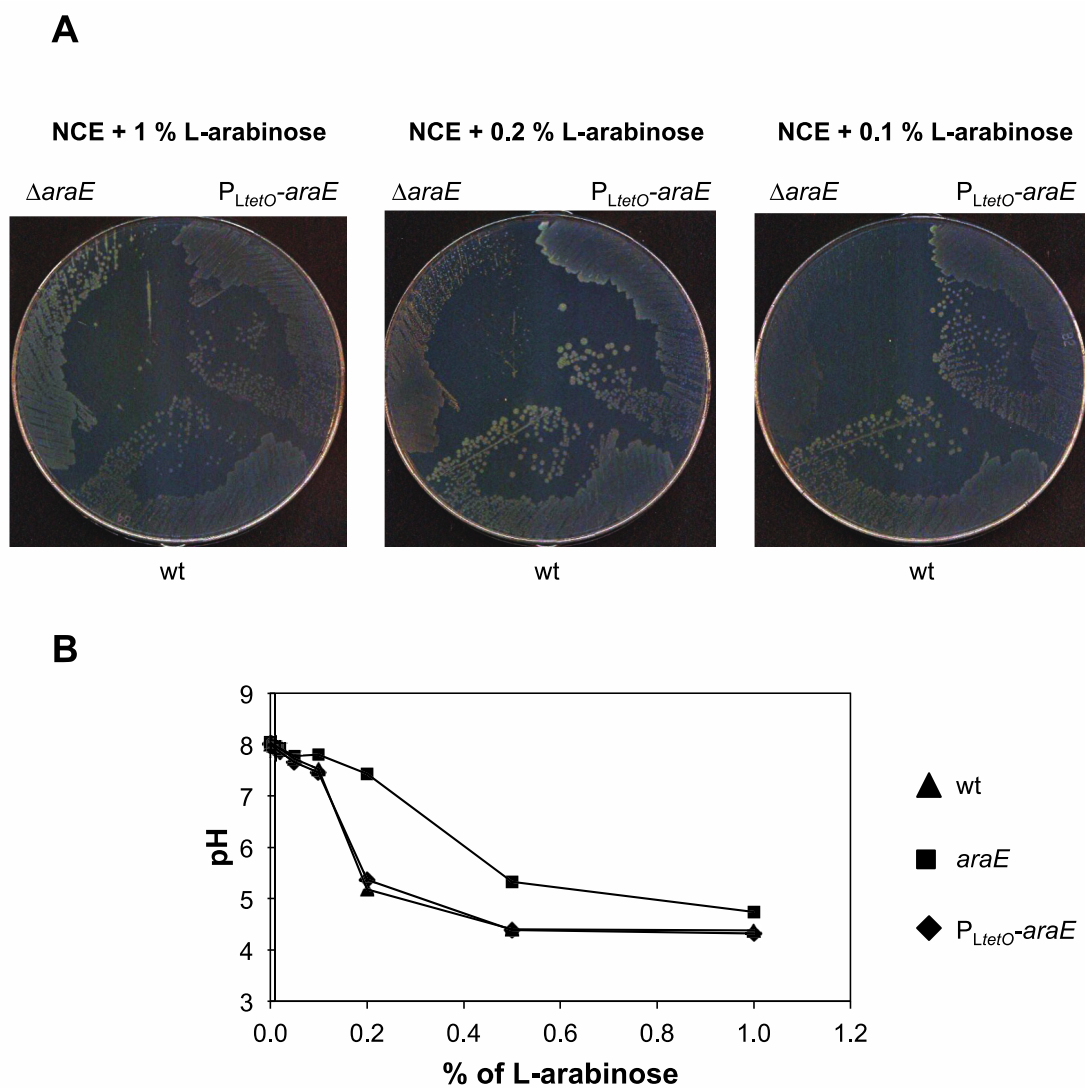

**Figure S6** Phenotypes associated with *araE*. **A.** Growth of the wild type,  $AraE^-$ , and  $P_{LtetO-araE}$  strains in minimal medium with 1%, 0.2% or 0.1% L-arabinose as sole carbon source. **B.** pH curves of wt,  $AraE^-$ , and  $P_{LtetO-araE}$  strains.
