# Supplementary material
Source: PubMed Central journal article supplement (PMC4512545)
Supplement: 10.1534_115.178103_genetics.115.178103-8.pdf [file 10.1534_115.178103_genetics.115.178103-8.pdf]

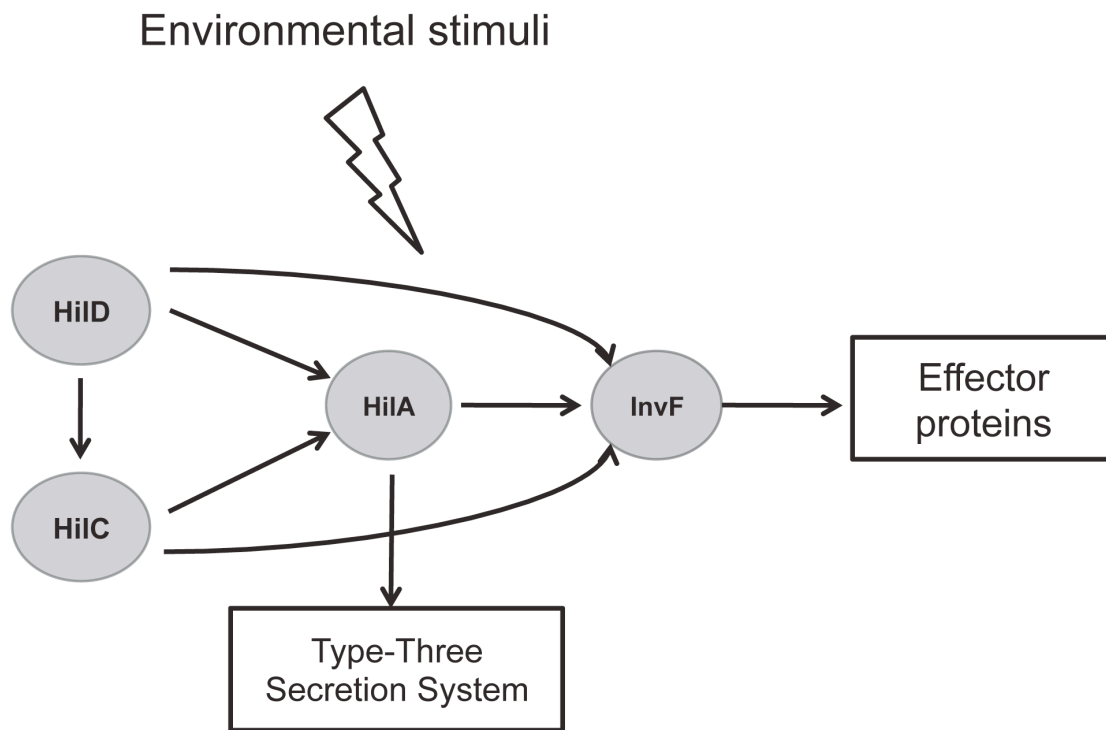

**Figure S1** Diagram representing the regulatory network of SPI-1-encoded transcriptional activators.
