# Supplementary material
Source: PubMed Central journal article supplement (PMC4512545)

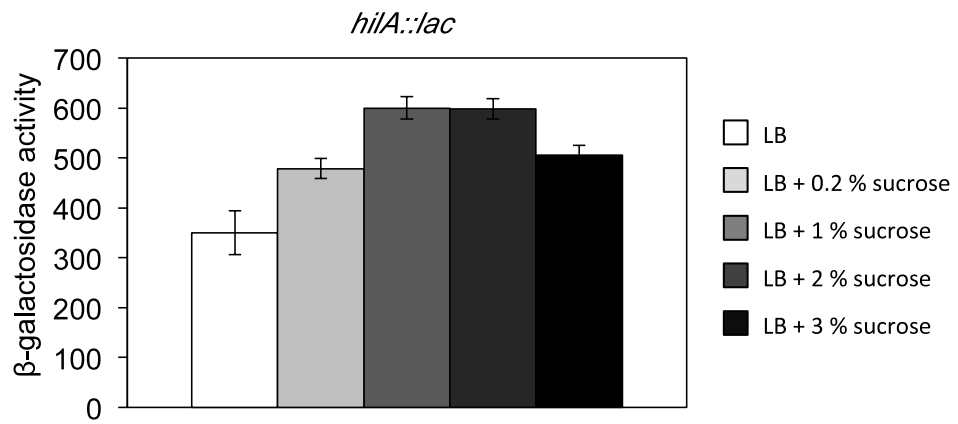

**Figure S5**  $\beta$ -galactosidase activity of a *hilA::lac* fusion in LB and LB + 0.2%, 1%, 2%, and 3% sucrose.

Supplement: 10.1534_115.178103_genetics.115.178103-7.pdf [file 10.1534_115.178103_genetics.115.178103-7.pdf]
